# Supplementary material for: Liposome Nanoparticle Conjugation and Cell Penetrating Peptide Sequences (CPPs) Enhance the Cellular Delivery of the Tau Aggregation Inhibitor RI-AG03
Source: Preprints.org preprint supplement (doi:10.20944/preprints202305.1403.v1), 2023-05-19
Supplement: Supplementary file 1 [file supplementary]

## **Supplementary material**

### **Liposome nanoparticle conjugation and cell penetrating peptide sequences (CPPs) enhance the cellular delivery of the Tau aggregation inhibitor RI-AG03**

Niklas Reich, David Allsop, Edward Parkin\* and Neil Dawson

Division of Biomedical and Life Sciences, Faculty of Health and Medicine, Lancaster University,  
Lancaster LA1 4YQ, UK

\* Correspondence: [e.parkin@lancaster.ac.uk](mailto:e.parkin@lancaster.ac.uk)

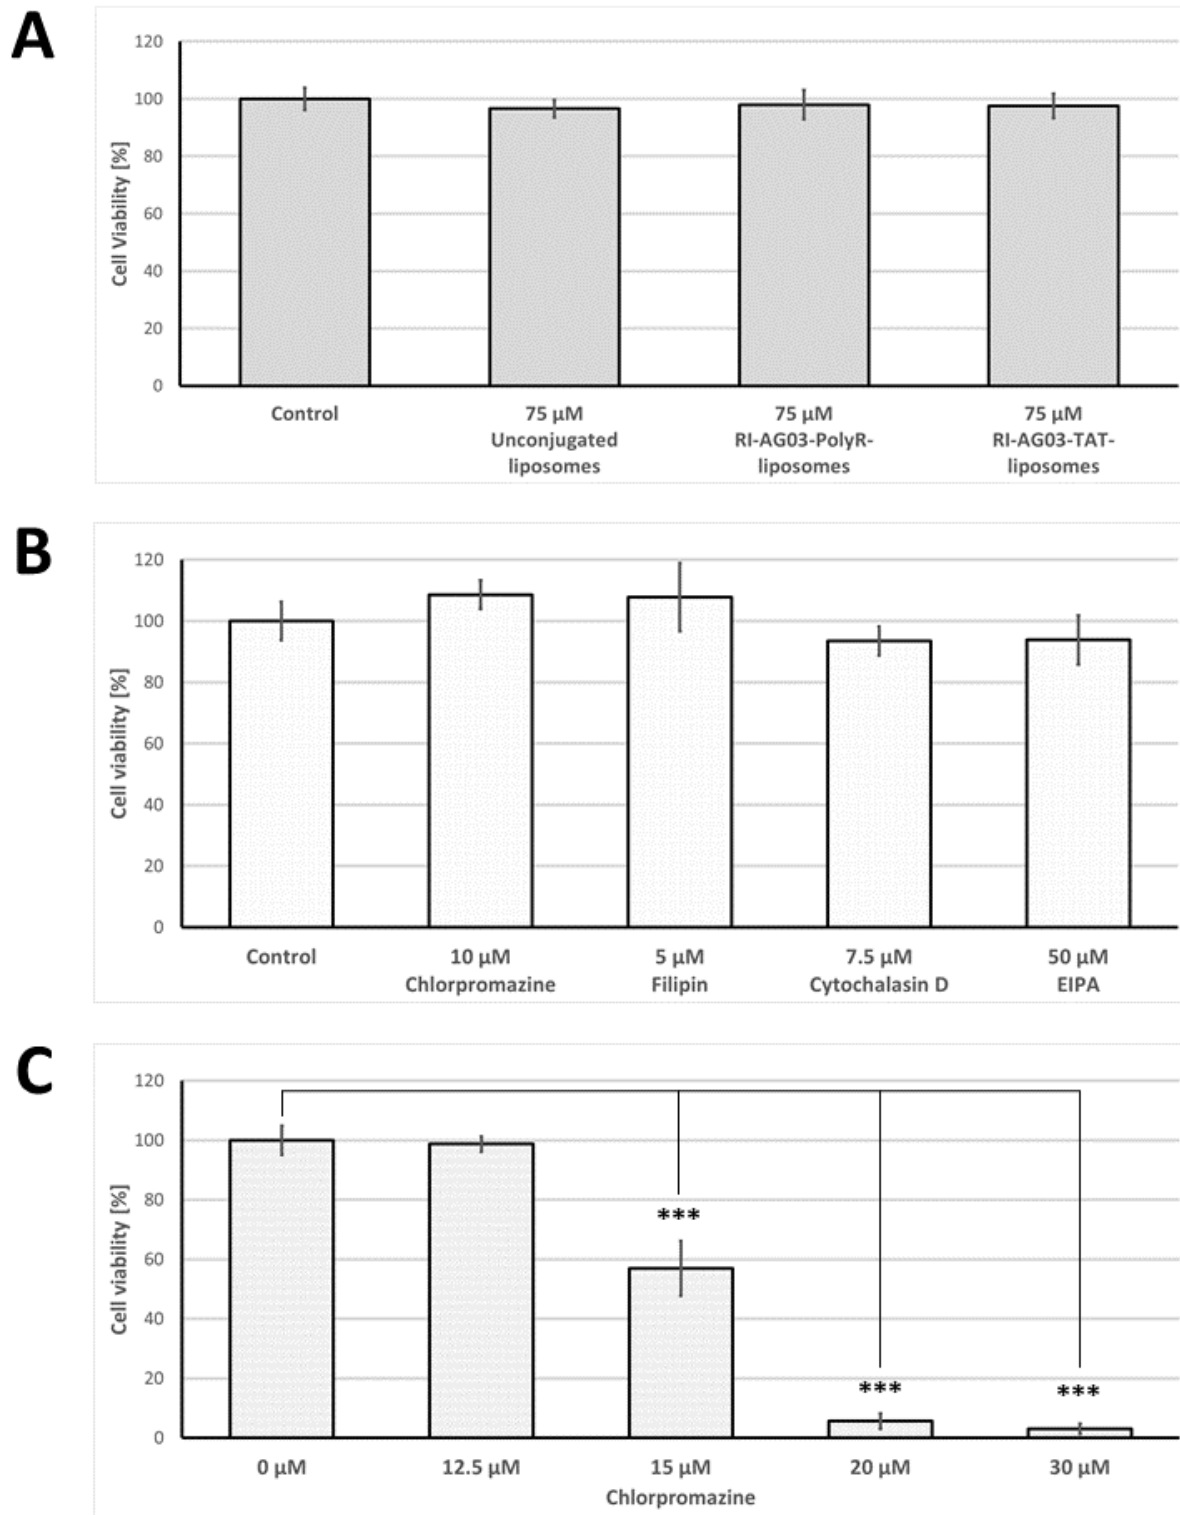

**Figure S1: Toxicity analysis of liposomes, peptide-liposomes and endocytosis inhibitors.**

SH-SY5Y cells were treated with the indicated final concentrations of (A) unconjugated, RI-AG03-polyR-conjugated or RI-AG03-TAT-conjugated liposomes and (B) endocytosis

inhibitors for 4.5 h. (C) The effects of increasing chlorpromazine concentrations on cell viability. Data show average cell viability in comparison to vehicle-treated controls ( $n = 6$ ; Mean  $\pm$  S.E.M), as assessed by the conversion of water-soluble tetrazolium salt-8 (WST-8). \*\*\*  $p < 0.01$  significant difference from vehicle-treated control (*post-hoc* Tukey's HSD).

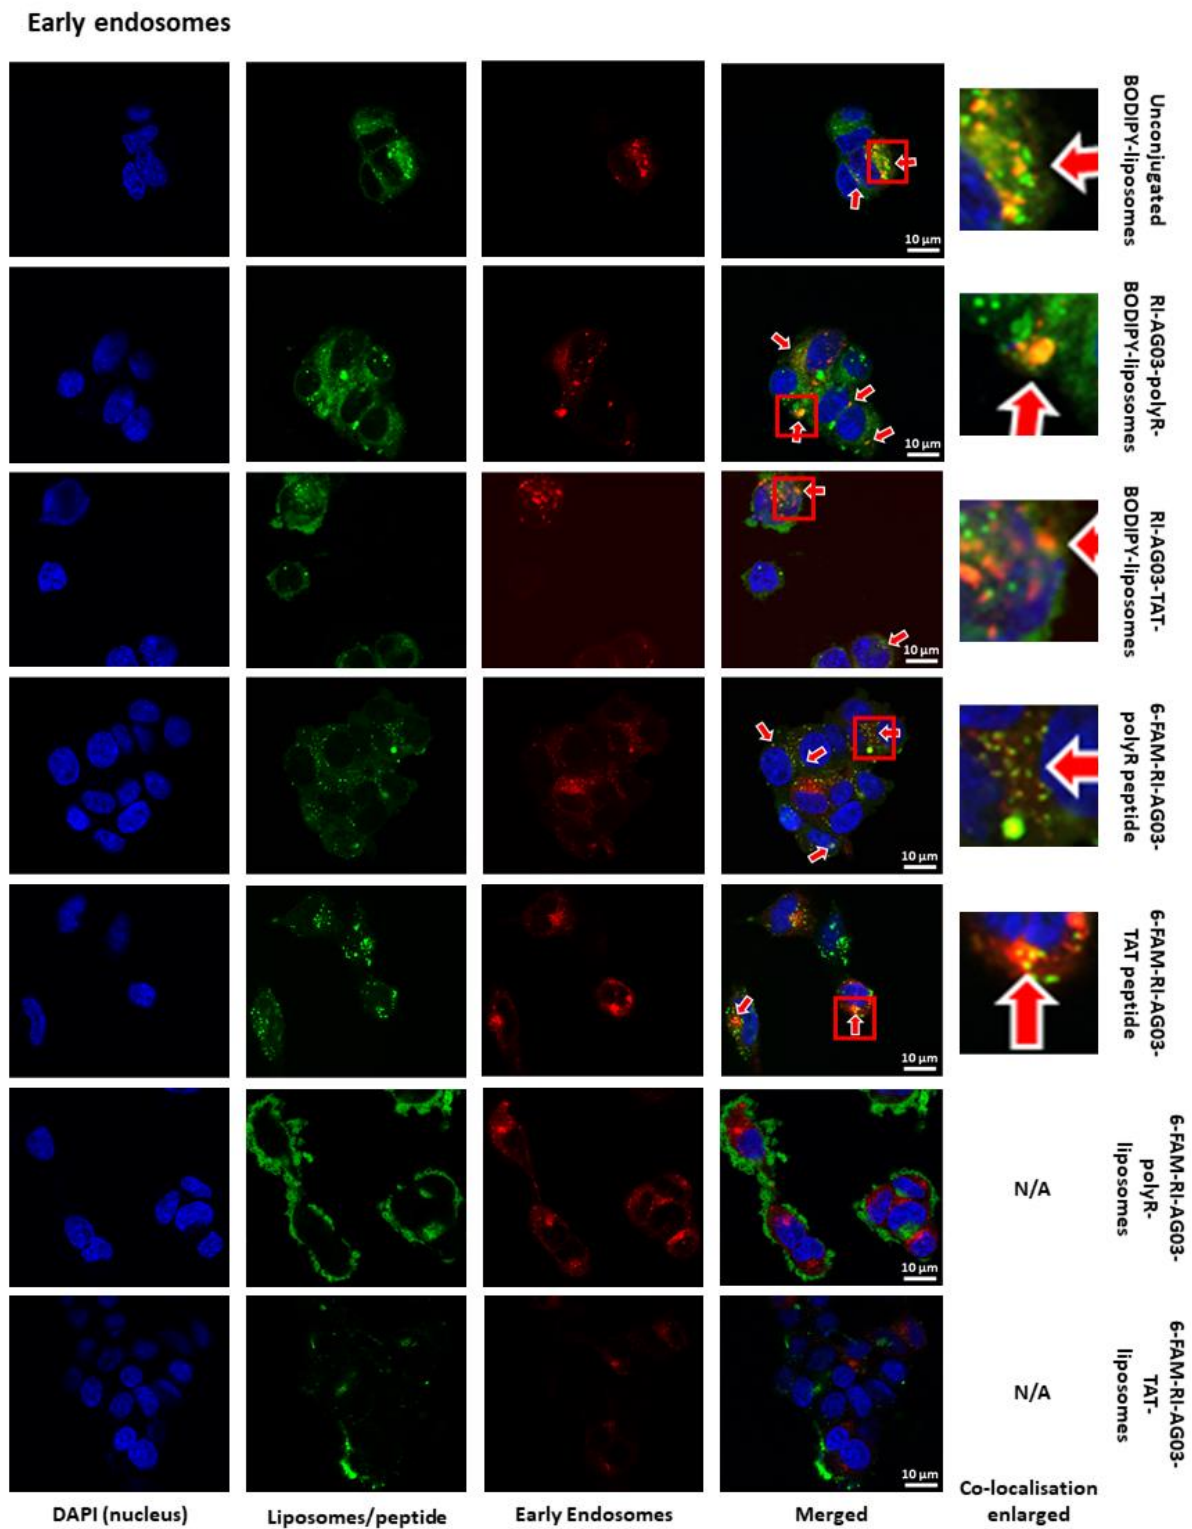

**Figure S2: Co-visualisation of RI-AG03, unconjugated liposomes and RI-AG03-conjugated liposomes with early endosomes.** SH-SY5Y cells were co-treated with the indicated constructs (either with a free or conjugated fluorescent 6-FAM peptide or fluorescent

BODIPY cholesterol in liposomes; in green) and Rab5a-RFP (CellLight™ Early Endosomes-RFP; in red) for 16 h. The nuclei were stained with DAPI (blue) and arrows indicate co-localisation.

# Endoplasmic reticulum

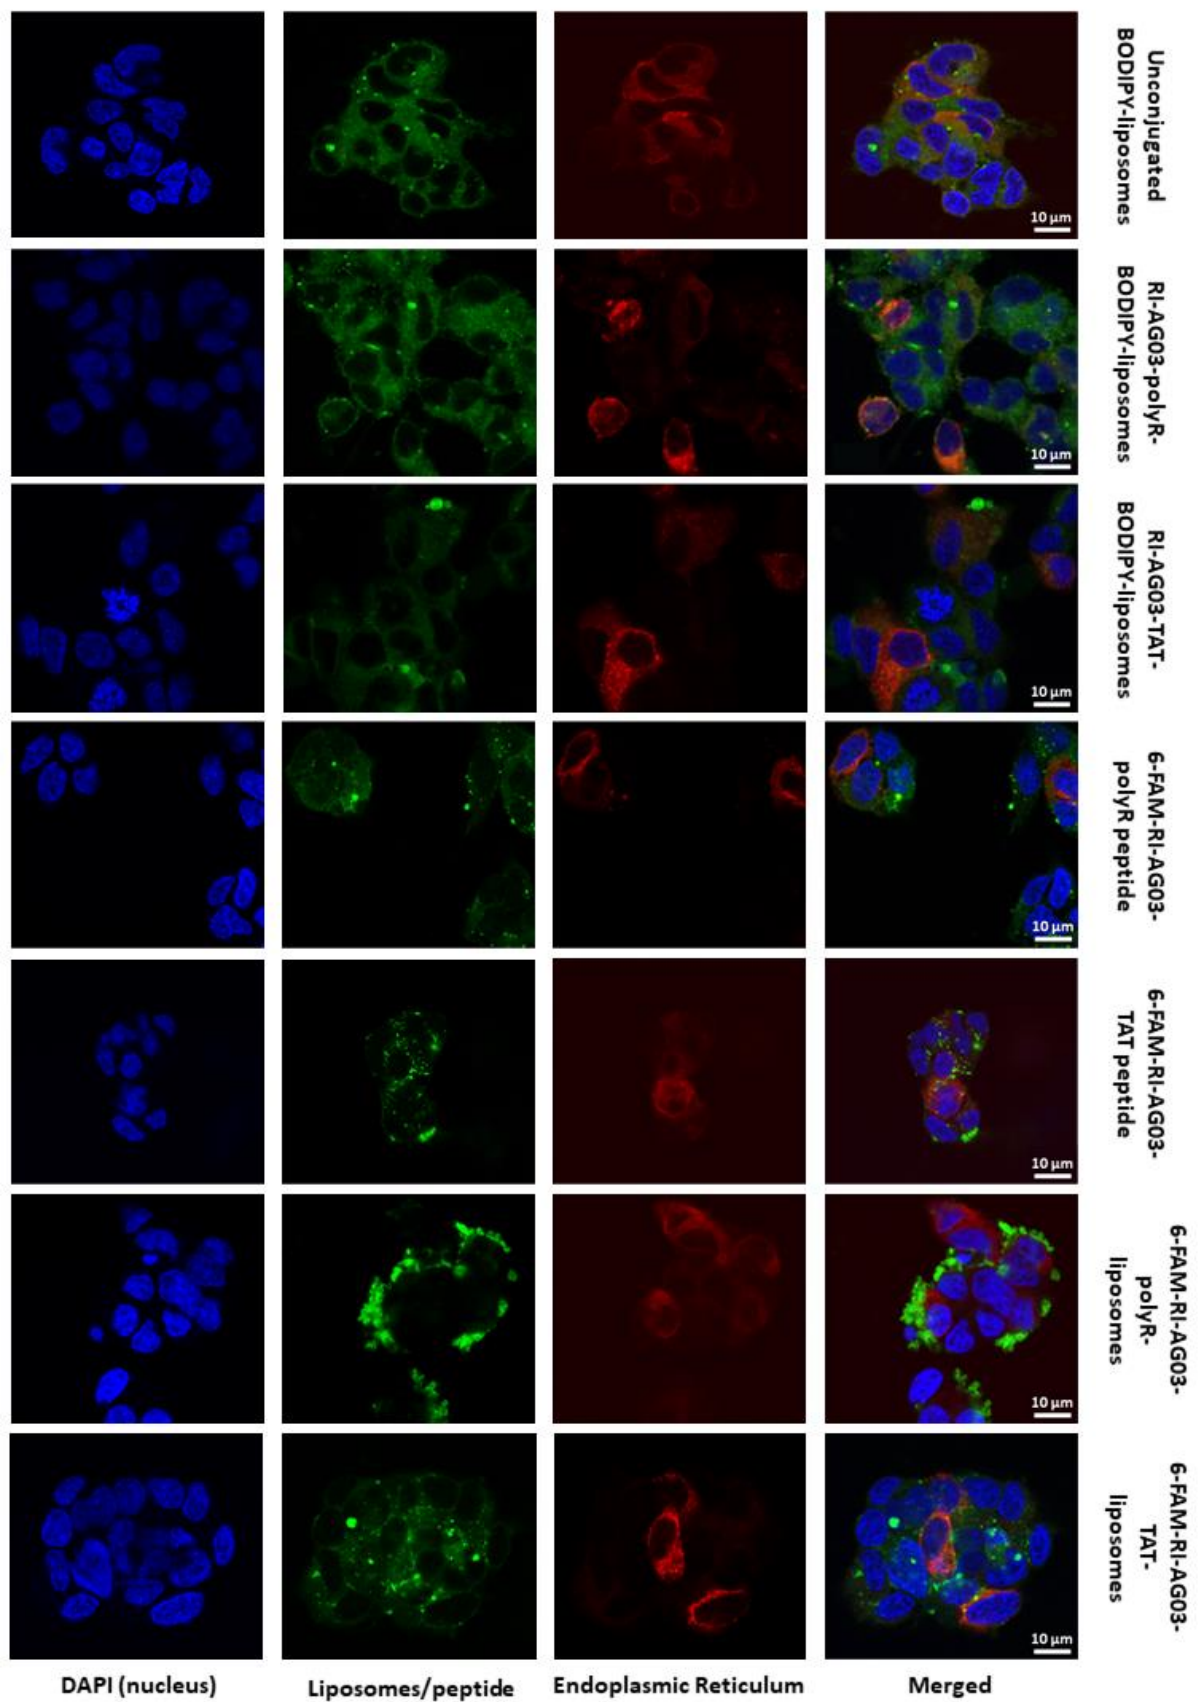

**Figure S3: Co-localisation of RI-AG03, unconjugated liposomes and RI-AG03-conjugated liposomes with the endoplasmic reticulum.** SH-SY5Y cells were exposed to various constructs, which was either an unconjugated or liposome-conjugated 6-FAM peptide, BODIPY cholesterol in liposomes or peptide-conjugated BODIPY-liposomes (in green), and co-stained with CellLight™ ER-RFP (in red), for 16 h. The nuclei were stained with DAPI (blue).

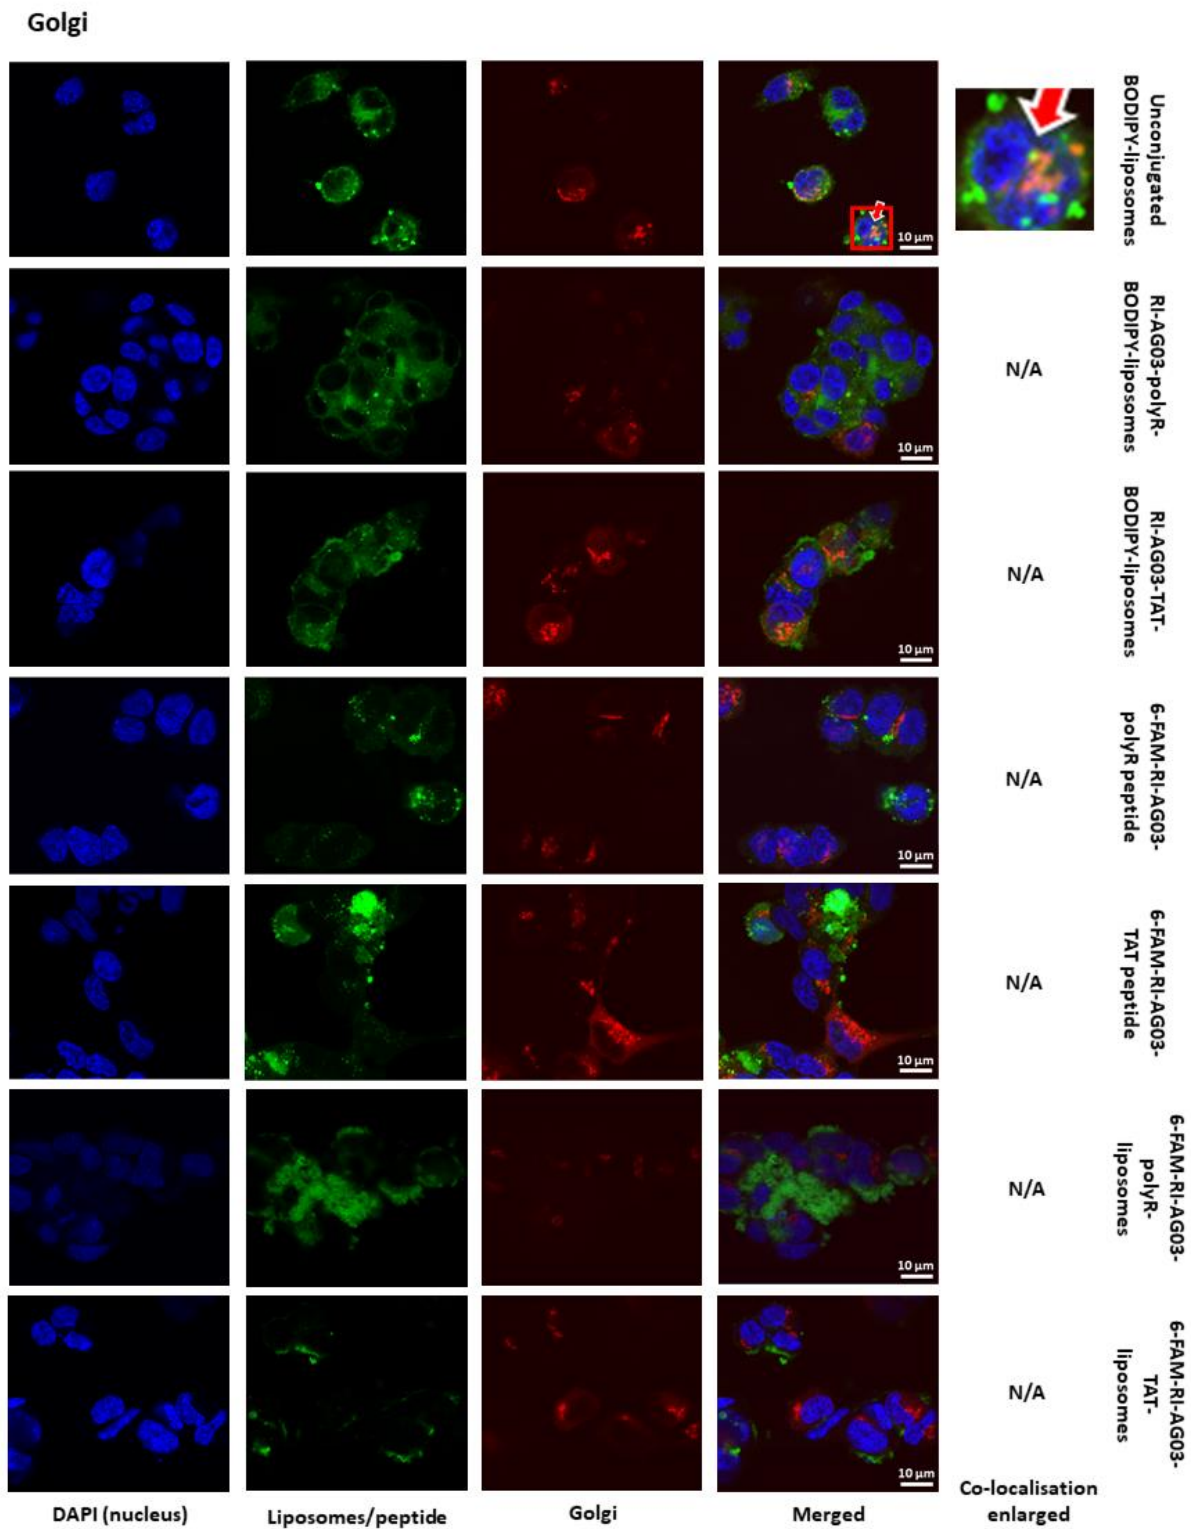

**Figure S4: Co-visualisation of RI-AG03, unconjugated liposomes and RI-AG03-conjugated liposomes with the Golgi.** SH-SY5Y cells were co-treated with the shown fluorescent 6-FAM-peptide or BODIPY-liposome constructs (in green) and N-acetylgalactosaminyltransferase-



RFP (CellLight™ Golgi-RFP; in red) for 16 h. The nuclei were stained with DAPI (blue) and arrows show co-localisation.
